# Supplementary material
Source: PubMed Central journal article supplement (PMC5434661)
Supplement: fj.201600985R.st1.pdf [file fj.201600985R.st1.pdf]

**Supplemental Table 1. Characteristics of the study subjects selected for analysis of liver DsbA-L protein levels**

|                        | Lean<br>(BMI $\leq$ 23, n=17) | Overweight/obese<br>(BMI >23, n=10) | <i>P</i> value |
|------------------------|-------------------------------|-------------------------------------|----------------|
| Age, years             | 52.1 $\pm$ 2.9                | 54.6 $\pm$ 2.6                      | 0.541          |
| BMI, kg/m <sup>2</sup> | 20.1 $\pm$ 0.4                | 25.3 $\pm$ 0.7                      | <0.001         |
| Fasting glucose, mM    | 5.2 $\pm$ 0.6                 | 6.1 $\pm$ 0.7                       | 0.386          |
